# Supplementary material for: Invasiveness, Monitoring and Control of Hakea sericea: A Systematic Review
Source: MDPI journal article supplement (doi:10.3390/plants12040751), 2023-02-07
Supplement: s1 [file s1]

# Supplementary Material (Table S1 and List S1)

**Table S1.** Number (no.) and percentage (%) of selected publications per country and formulated question (Q).

|           | AU   | SA   | PT  | GB  | NZ  | CH  | AU<br>SA | PT<br>SP | EU  | CH AU<br>US SA | SL<br>UK | SP<br>US | GR  | AU SA BR<br>CN PN | AU<br>US | AU SA<br>UK US | AU<br>ZI | AUS BR<br>CH | SA FR<br>NZ | AU<br>NZ | AU<br>SW | US  | SP  | FR  | TOT   |
|-----------|------|------|-----|-----|-----|-----|----------|----------|-----|----------------|----------|----------|-----|-------------------|----------|----------------|----------|--------------|-------------|----------|----------|-----|-----|-----|-------|
| Q 1       | 67   | 7    | 3   | 6   | 0   | 3   | 3        | 0        | 0   | 1              | 1        | 1        | 1   | 1                 | 1        | 0              | 0        | 1            | 0           | 1        | 1        | 0   | 0   | 0   | 98    |
| Q 2       | 16   | 2    | 1   | 0   | 4   | 0   | 0        | 0        | 0   | 0              | 0        | 0        | 0   | 0                 | 0        | 0              | 0        | 0            | 1           | 0        | 0        | 0   | 0   | 0   | 24    |
| Q 3       | 2    | 39   | 6   | 0   | 1   | 0   | 0        | 1        | 2   | 0              | 0        | 0        | 0   | 0                 | 0        | 0              | 0        | 0            | 0           | 0        | 0        | 1   | 1   | 1   | 54    |
| Q 1,2     | 10   | 0    | 0   | 1   | 0   | 0   | 1        | 0        | 0   | 0              | 0        | 0        | 0   | 0                 | 0        | 0              | 0        | 0            | 0           | 0        | 0        | 0   | 0   | 0   | 12    |
| Q 1,3     | 4    | 4    | 1   | 1   | 1   | 0   | 0        | 0        | 0   | 0              | 0        | 0        | 0   | 0                 | 0        | 1              | 1        | 0            | 0           | 0        | 0        | 0   | 0   | 0   | 13    |
| Q 1,2,3   | 2    | 1    | 1   | 1   | 0   | 0   | 0        | 1        | 0   | 0              | 0        | 0        | 0   | 0                 | 0        | 0              | 0        | 0            | 0           | 0        | 0        | 0   | 0   | 0   | 6     |
| TOT (no.) | 101  | 53   | 12  | 9   | 6   | 3   | 4        | 2        | 2   | 1              | 1        | 1        | 1   | 1                 | 1        | 1              | 1        | 1            | 1           | 1        | 1        | 1   | 1   | 1   | 207   |
| %         | 48,8 | 25,6 | 5,8 | 4,4 | 2,9 | 1,5 | 1,9      | 1,0      | 1,0 | 0,5            | 0,5      | 0,5      | 0,5 | 0,5               | 0,5      | 0,5            | 0,5      | 0,5          | 0,5         | 0,5      | 0,5      | 0,5 | 0,5 | 0,5 | 100,0 |

AU Australia, SA South Africa, PT Portugal, GB Global, NZ New Zealand, CH Chile, SP Spain, EU Europe, US United States, GR Germany, CN China, ZI Zimbabwe, FR France, SW Swiss.

**List S1.** Full list of publications selected in the systematic literature search.

- Adair, R.J. Biological control of Australian native plants, in Australia, with an emphasis on Acacias. *Muelleria* **2008**, 26, 67–78. doi: 10.5962/p.292495
- Alvarez-Taboada, F.; Paredes, C.; Julián-Pelaz, J. Mapping of the invasive species *Hakea sericea* using Unmanned Aerial Vehicle (UAV) and Worldview-2 Imagery and an object-oriented approach. *Remote Sens.* **2017**, 9, 913. doi:10.3390/rs9090913
- Arnaud, A.; Chapman, D.; Le Roux, J.; Linnamagi, M.; Marchante, E.; Pasiecznik, N.; Pescott, O.; Singh, I.; Starfinger, U.; Vicente, J.; Tanner, R. *Hakea sericea* Schrad. & J.C.Wendl. *EPPO Bull.* **2019**, 49, 273–279, doi:10.1111/epp.12527
- Barker, W. R. Novelties and taxonomic notes relating to *Hakea* Sect. *Hakea* (Proteaceae), mainly of eastern Australia. *J. Adelaide Bot. Gard.* **1996**, 17, 177–209.
- Bell, D. T. Interaction of fire, temperature and light in the germination response of 16 Species from the *Eucalyptus marginata* forest of south-western. *Aust. J. Bot.* **1994**, 42, 501–509. doi:10.1071/BT9940501
- Bell, D.T. Ecological Response Syndromes in the flora of southwestern Western Australia: fire resprouters versus reseeders. *Bot. Rev.* **2001**, 67, 417–440. doi:10.1007/BF02857891
- Bell, D.T.; Van Der Moezel, P.G.; Delfs, J.C.; Loneragan, W.A. Northern sandplain Kwongan: Effect of fire on *Hakea obliqua* and *Beaufortia elegans* population structure. *J. - R. Soc. West. Aust.* **1987**, 69, 139–143
- Bell, D.T.; Vlahos, S.; Watson, L.E. Stimulation of seed-germination of understorey species of the Northern Jarrah Forest of Western-Australia. *Aust. J. Bot.* **1987**, 35, 593–599. doi:10.1071/BT9870593
- Bell, D.T.; Williams, D.S. Tolerance of Thermal Shock in Seeds. *Aust. J. Bot.* **1998**, 46, 221–233. doi:10.1071/bt97010
- Bradstock, R.A.; Gill, A.M.; Hastings, S.M.; Moore, P.H.R. Survival of serotinous seedbanks during bushfires: comparative studies of *Hakea* species from Southeastern Australia. *Aust. J. Ecol.* **1994**, 19, 276–282. doi:10.1111/j.1442-9993.1994.tb00490.x
- Breytenbach, G.J. Alien control: can we afford to slash and burn *Hakea* in Fynbos Ecosystems? *South African For. J.* **1989**, 151, 6–16. doi:10.1080/00382167.1989.9630499
- Brown, C.L.; Whelan, R.J. Seasonal occurrence of fire and availability of germinable seeds in *Hakea sericea* and *Petrophile sessilis*. *J. Ecol.* **1999**, 87, 932–941. doi:10.1046/j.1365-2745.1999.00401.x
- Brunel, S.; Schrader, G.; Brundu, G.; Fried, G. Emerging invasive alien plants for the Mediterranean basin. *EPPO Bull.* **2010**, 40, 219–238. doi:10.1111/j.1365-2338.2010.02378.x
- Canavan, K.; Canavan, S.; Clark, V.R.; Gwate, O.; Richardson, D.M.; Sutton, G.F.; Martin, G.D. The alien plants that threaten South Africa's mountain ecosystems. *Land* **2021**, 10, 1–19. doi:10.3390/land10121393
- Cardillo, M.; Weston, P.H.; Reynolds, Z.K.M.; Olde, P.M.; Mast, A.R.; Lemmon, E.M.; Lemmon, A.R.; Bromham, L. The phylogeny and biogeography of *Hakea* (Proteaceae) reveals the role of biome shifts in a continental plant radiation. *Evolution (N. Y.)* **2017**, 71, 1928–1943. doi:10.1111/evo.13276
- Causley, C.L.; Fowler, W.M.; Lamont, B.B.; He, T. Fitness benefits of serotiny in fire- and drought-prone environments. *Plant Ecol.* **2016**, 217, 773–779. doi:10.1007/s11258-015-0552-y
- Cheney, C.; van Wilgen, N.J.; Esler, K.J.; Foxcroft, L.C.; McGeoch, M.A. Quantifying range structure to inform management in invaded landscapes. *J. Appl. Ecol.* **2021**, 58, 338–349. doi:10.1111/1365-2664.13765
- Clarkson, B.R.; Smale, M.C.; Williams, P.A.; Wiser, S.K.; Buxton, R.P. Drainage, soil fertility and fire frequency determine composition and structure of gumland heaths in northern New Zealand. *N. Z. J. Ecol.* **2011**, 35, 96–113.
- Collins, L.; Boer, M.M.; de Dios, V.R.; Power, S.A.; Bendall, E.R.; Hasegawa, S.; Hueso, R.O.; Nevado, J.P.; Bradstock, R.A. Effects of competition and herbivory over woody seedling growth in a temperate woodland trump the effects of elevated CO<sub>2</sub>. *Oecologia* **2018**, 187, 811–823. doi:10.1007/s00442-018-4143-1
- Cramer, M.D.; Midgley, J.J. Maintenance costs of serotiny do not explain weak serotiny. *Austral Ecol.* **2009**, 34, 653–662. doi:10.1111/j.1442-9993.2009.01971.x
- Daehler, C.C. Performance comparisons of co-occurring native and alien invasive plants: implications for conservation and restoration. *Annu. Rev. Ecol. Evol. Syst.* **2003**, 34, 183–211. doi:10.1146/annurev.ecolsys.34.011802.132403
- Delgado, M.; Zúñiga-Feest, A.; Alvear, M.; Borie, F. The effect of phosphorus on cluster-root formation and functioning of *Embothrium coccineum* (R. et J. Forst.). *Plant and soil* **2013**, 373, 765–773. doi: 10.1007/s11104-013-1829-3
- Delgado, M.; Suriyagoda, L.; Zúñiga-Feest, A.; Borie, F.; Lambers, H. Divergent functioning of Proteaceae species: the South American *Embothrium coccineum* displays a combination of adaptive traits to survive in high-phosphorus soils. *Funct. Ecol.* **2014**, 28, 1356–1366. doi:10.1111/1365-2435.12303
- Delgado, M.; Zúñiga-Feest, A.; Almonacid, L.; Lambers, H.; Borie, F. Cluster roots of *Embothrium coccineum* (Proteaceae) affect enzyme activities and phosphorus lability in rhizosphere soil. *Plant and soil*, **2015**, 395, 189–200. doi:10.1007/s11104-015-2547-9
- Dell, B.; Kuo, J.; Thomson, G.J. Development of proteoid roots in *Hakea obliqua* R. Br.(Proteaceae) grown in water culture. *Aust. J. Bot.* **1980**, 28, 27–37. doi:10.1071/BT9800027
- Dennill, G.B. The importance of technique in establishing biocontrol agents—the moth *Carposina autologa* on *Hakea sericea*. *Ann. Appl. Biol.* **1987**, 110, 163–168. doi: 10.1111/j.1744-7348.1987.tb03243.x
- Dennill, G.B.; Gordon, A.J.; Neser, S. Difficulties with the release and establishment of *Carposina autologa* Meyrick (Carposinidae) on the weed *Hakea sericea* (Proteaceae) in South Africa. *J. Entomol. Soc. South. Afr.* **1987**, 50, 463–468.

- Dettmann, M.E.; Clifford, H.T. Fossil fruit of the *Grevilleae* (Proteaceae) in the Tertiary of eastern Australia. *Memoirs of the Queensland Museum* **2005**, *51*, 359–374.
- Ding, J.; Travers, S.K.; Eldridge, D.J. Occurrence of Australian woody species is driven by soil moisture and available phosphorus across a climatic gradient. *J. Veg. Sci.* **2021**, *36*, e13095. doi: 10.1111/jvs.13095
- Dinnage, R.; Skeels, A.; Cardillo, M. Spatiophylogenetic modelling of extinction risk reveals evolutionary distinctiveness and brief flowering period as threats in a hotspot plant genus. *Proc. R. Soc. B: Biol.* **2020**, *287*, 20192817. doi:10.1098/rspb.2019.2817
- Ducatillion, C.; Badeau, V.; Bellanger, R.; Buchlin, S.; Diadema, K.; Gild, A.; Thevenet, J. Early detection of invasion risk by exotic plant species introduced in forest arboretum in south-eastern France. Emergence of species of the genus *Hakea*. Measures for management. *Revue d'Ecologie* **2015**, *70*, 139–150.
- Duncan, C.; Schultz, N.L.; Good, M.K.; Lewandowski, W.; Cook, S. The risk-takers and-avoiders: germination sensitivity to water stress in an arid zone with unpredictable rainfall. *AoB Plants*, **2019**, *11*, plz066. doi:10.1093/aobpla/plz066
- Dyer, C.; Richardson, D.M. Population genetics of the invasive Australian shrub *Hakea sericea* (Proteaceae) in South Africa. *S. Afr. J. Bot.* **1992**, *58*, 117–124. doi:10.1016/S0254-6299(16)30881-X
- El-Amhir, S.H.; Lamont, B.B.; He, T.; Yan, G. Small-seeded *Hakea* Species tolerate cotyledon loss better than large-seeded congeners. *Sci. Rep.* **2017**, *7*, 1–9. doi:10.1038/srep41520
- El-Amhir, S.H.M.; Lim, S.L.; Lamont, B.B.; He, T. Seed Size, Fecundity and Postfire Regeneration Strategy Are Interdependent in *Hakea*. *PLoS One* **2015**, *10*, 1–12. doi:10.1371/journal.pone.0129027
- Enright, N.J.; Goldblum, D. Demography of a non-sprouting and resprouting *Hakea* species (Proteaceae) in fire-prone *Eucalyptus* woodlands of southeastern Australia in relation to stand age, drought and disease. *Plant Ecol.* **1999**, *144*, 71–82. doi:10.1023/A:1009839800864
- Erckie, L.; Adedaja, O.; Geerts, S.; Van Wyk, E.; Boatwright, J. S. Impacts of an invasive alien Proteaceae on native plant species richness and vegetation structure. *S. Afr. J. Bot.* **2022**, *144*, 332–338. doi:10.1016/j.sajb.2021.09.017
- Esler, K.J.; van Wilgen, B.W.; te Roller, K.S.; Wood, A.R.; van der Merwe, J.H. A Landscape-scale assessment of the long-term integrated control of an invasive shrub in South Africa. *Biol. Invasions* **2010**, *12*, 211–218. doi:10.1007/s10530-009-9443-2
- Fischer, M.; Beismann, H. 3D Characterization of the complex vascular bundle system of *Hakea* Fruits based on X-Ray Microtomography (MCT) for a better understanding of the opening mechanism. *Flora Morphol. Distrib. Funct. Ecol. Plants* **2022**, *289*, 1–9. doi:10.1016/j.flora.2022.152035
- Forsyth, G.G.; Le Maitre, D.C.; O'Farrell, P.J.; van Wilgen, B.W. The prioritisation of invasive alien plant control projects using a multi-criteria decision model informed by stakeholder input and spatial data. *J. Environ. Manage.* **2012**, *103*, 51–57. doi:10.1016/j.jenvman.2012.01.034
- Fugler, S.R. Infestations of three Australian *Hakea* Species in South Africa and their control. *South African For. J.* **1982**, *120*, 63–68. doi:10.1080/00382167.1982.9630244
- Gordon, A. J.; Fourie, A. Biological control of *Hakea sericea* Schrad. & JC Wendl. and *Hakea gibbosa* (Sm.) Cav.(Proteaceae) in South Africa. *African Entomology*, **2011**, *19*, 303–314. doi:10.4001/003.019.0205
- Gordon, A.J. A Review of Established and new insect agents for the biological control of *Hakea sericea* Schrader (Proteaceae) in South Africa. *African Entomol. Mem.* **1999**, *1*, 35–43.
- Gordon, A.J. Biology and Host Range of the Stem-Boring Beetle *Aphanasium australe*, a promising agent for the biological control of *Hakea sericea* in South Africa. *BioControl* **2003**, *48*, 113–122. doi:10.1023/A:1021245017334
- Gordon, A.J. The impact of the *Hakea* seed-moth *Carposina autologa* (Carposinidae) on the canopy-stored seeds of the weed *Hakea sericea* (Proteaceae). *Agric. Ecosyst. Environ.* **1993**, *45*, 105–113. doi:10.1016/0167-8809(93)90062-T
- Gordon, A.J.; Lyons, C.L. Current status of *Carposina autologa* (Lepidoptera: Carposinidae), a biological control agent of silky *Hakea*, *Hakea Sericea* (Proteaceae) and rock *Hakea*, *Hakea gibbosa* (Proteaceae) in the Western Cape, South Africa. *African Entomol.* **2017**, *25*, 250–253. doi:10.4001/003.025.0250
- Groom, P.K. Implications of terminal velocity and wing loading on *Hakea* (Proteaceae) seed dispersal. *J. R. Soc. West. Aust.* **2010**, *93*, 175.
- Groom, P.; Lamont, B. Leaf morphology and life form influence water relations of *Hakea* species on different soil substrates within southwestern Australia. *Acta Oecol* **1995**, *16*, 609–620
- Groom, P.K.; Lamont, B.B. Ecogeographical analysis of *Hakea* (Proteaceae) in South-Western Australia, with special reference to leaf morphology and life form. *Aust. J. Bot.* **1996**, *44*, 527–542. doi:10.1071/BT9960527
- Groom, P.K.; Lamont, B.B. Fruit-Seed relations in *Hakea*: serotinous species invest more dry matter in predispersal seed protection. *Austral Ecol.* **1997**, *22*, 352–355. doi:10.1111/j.1442-9993.1997.tb00682.x
- Groom, P.K.; Lamont, B.B. Phosphorus accumulation in Proteaceae Seeds: a synthesis. *Plant Soil* **2010**, *334*, 61–72. doi:10.1007/s11104-009-0135-6
- Groom, P.K.; Lamont, B.B. Xerophytic implications of increased sclerophylly: interactions with water and light in *Hakea psilorrhyncha* seedlings. *New Phytol.* **1997**, *136*, 231–237. doi:10.1046/j.1469-8137.1997.00732.x
- Groom, P.K.; Lamont, B.B.; Markey, A.S. Influence of leaf type and plant age on leaf structure and sclerophylly in *Hakea* (Proteaceae). *Aust. J. Bot.* **1997**, *45*, 827–838. doi:10.1071/BT96115
- Guilherme Pereira, C.; Hayes, P.E.; Clode, P.L.; Lambers, H. Phosphorus Toxicity, not deficiency, explains the calcifuge habit of phosphorus-efficient Proteaceae. *Physiol. Plant.* **2021**, *172*, 1724–1738. doi:10.1111/pp.13384.

- Guilherme Pereira, C.; Hayes, P.E.; O'Sullivan, O.S.; Weerasinghe, L.K.; Clode, P.L.; Atkin, O.K.; Lambers, H. Trait convergence in photosynthetic nutrient-use efficiency along a 2-million year dune chronosequence in a global biodiversity hotspot. *J. Ecol.* **2019**, *107*, 2006–2023. doi:10.1111/1365-2745.13158
- Hammill, K.A.; Bradstock, R.A.; Allaway, W.G. Post-fire seed dispersal and species re-establishment in proteaceous heath. *Aust. J. Bot.* **1998**, *46*, 407–419
- Hayes, P.E.; Clode, P.L.; Oliveira, R.S.; Lambers, H. "Proteaceae from phosphorus-impovertished habitats preferentially allocate phosphorus to photosynthetic cells: An adaptation improving phosphorus-use efficiency." *Plant, Cell & Environ.* **2018**, *41*, 605–619. doi: 10.1111/pce.13124
- Hayes, P.E.; Nge, F.J.; Cramer, M.D.; Finnegan, P.M.; Fu, P.; Hopper, S.D.; Oliveira, R.S.; Turner, B.L.; Zemunik, G.; Zhong, H.; et al. Traits related to efficient acquisition and use of phosphorus promote diversification in Proteaceae in phosphorus-impovertished landscapes. *Plant Soil* **2021**, *462*, 67–88. doi:10.1007/s11104-021-04886-0
- Heelemann, S.; Proches, S.; Rebelo, A.G.; Van Wilgen, B.W.; Porembski, S.; Cowling, R.M. Fire season effects on the recruitment of non-sprouting serotinous Proteaceae in the eastern (bimodal rainfall) fynbos biome, South Africa. *Austral Ecol.* **2008**, *33*, 119–127. doi: 10.1111/j.1442-9993.2007.01797.x
- Hoang, S.A.; Lamb, D.; Sarkar, B.; Seshadri, B.; Kit Yu, R.M.; Anh Tran, T.K.; O'Connor, J.; Rinklebe, J.; Kirkham, M.B.; Vo, H.T.; Bohan, N.S. Phosphorus application enhances alkane hydroxylase gene abundance in the rhizosphere of wild plants grown in petroleum-hydrocarbon-contaminated Soil. *Environ. Res.* **2022**, *204*, 1–10. <https://doi.org/10.1016/j.envres.2021.111924>.
- Hoang, S.A.; Lamb, D.; Seshadri, B.; Sarkar, B.; Cheng, Y.; Wang, L.; Bolan, N.S. Petroleum hydrocarbon rhizoremediation and soil microbial activity improvement via cluster root formation by wild proteaceae plant species. *Chemosphere* **2021**, *275*,. doi:10.1016/j.chemosphere.2021.130135
- Holmes, P.M.; Marais, C. Impacts of alien plant clearance on vegetation in the mountain catchments of the Western Cape. *South African For. J.* **2000**, *189*, 113–117. doi:10.1080/10295925.2000.9631286
- James, K.; Bradshaw, K. Detecting plant species in the field with deep learning and drone technology. *Methods Ecol Evol.* **2020**, *11*, 1509–1519. doi:10.1111/2041-210X.13473
- Jeffrey, D.W. "Phosphate nutrition of Australian heath plants. II. The formation of polyphosphate by five heath species." *Aust. J. Bot.* **1968**, *16*, 603–613. doi: <http://doi.org/10.1071/BT968060>
- Johnston, P.R. Potential of fungi for the biological control of some New Zealand Weeds. *New Zeal. J. Agric. Res.* **1990**, *33*, 1–14. doi:10.1080/00288233.1990.10430655
- Jordan, G.J.; Carpenter, R.J.; Brodribb, T.J. Using fossil leaves as evidence for open vegetation. *Palaeogeogr. Palaeoclimatol. Palaeoecol.* **2014**, *395*, 168–175. doi:10.1016/j.palaeo.2013.12.035
- Kirkpatrick, J.; Gilfedder, L.; Duncan, F.; Wapstra, M. Frequent Planned fire can prevent succession to woody plant dominance in montane temperate grasslands. *Austral Ecol.* **2020**, *45*, 872–879. doi:10.1111/aec.12901
- Kluge, R.L.; Gordon, A.J. The Fixed plot survey method for determining the host range of the flowerbud-feeding weevil *dicomada rufa*, a candidate for the biological control of *Hakea sericea* in South Africa. *BioControl* **2004**, *49*, 341–355. doi:10.1023/B:BICO.0000025384.15189.38
- Kluge, R.L.; Marshall, C.R.; Siebert, M.W. Tebuthiuron as a selective herbicide for the control of *Hakea gibbosa* (Proteaceae) in Mountain Fynbos vegetation. *South African For. J.* **1987**, *140*, 35–38. doi:10.1080/00382167.1987.9630067
- Kluge, R.L.; Neser, S. Biological control of *Hakea sericea* (Proteaceae) in South Africa. *Agric. Ecosyst. Environ.* **1991**, *37*, 91–113. doi:10.1016/0167-8809(91)90141-J
- Kluge, R.L.; Siebert, M.W. *Erytenna Consputa pascoe* (Coleoptera: Curculionidae) as the main mortality factor of developing fruits of the weed, *Hakea sericea* Schrader, in South Africa. *J. Entomol. Soc. South. Afr.* **1985**, *48*, 241–245.
- Knox, K.J.; Morrison, D.A. Effects of inter-fire intervals on the reproductive output of resprouters and obligate seeders in the Proteaceae. *Austral Ecol.* **2005**, *30*, 407–413. doi:10.1111/j.1442-9993.2005.01482.x
- Knox, K.J.E.; Clarke, P.J. Fire season and intensity affect shrub recruitment in temperate sclerophyllous woodlands. *Oecologia* **2006**, *149*, 730–739. doi:10.1007/s00442-006-0480-6
- Knox, K.J.E.; Clarke, P.J. Response of resprouting shrubs to repeated fires in the dry sclerophyll forest of Gibraltar Range National Park. *Proc. Linn. Soc. New South Wales* **2006**, *127*, 49–56.
- Kotula, L.; Clode, P.L.; Ranathunge, K.; Lambers, H. Role of roots in adaptation of soil-indifferent Proteaceae to calcareous soils in south-western Australia. *J. Exp. Bot.* **2021**, *72*, 1490–1505. doi:10.1093/jxb/eraa515
- Kuo, J.; Hocking, P.J.; Pate, J.S. Nutrient reserves in seeds of selected proteaceous species from south-western Australia. *Aust. J. Bot.* **1982**, *30*, 231–249. doi: 10.1071/BT9820231
- Kuppusamy, T.; Giavalisco, P.; Arvidsson, S.; Sulpice, R.; Stitt, M.; Finnegan, P.M.; ... Jost, R. Lipid biosynthesis and protein concentration respond uniquely to phosphate supply during leaf development in highly phosphorus-efficient *Hakea prostrata*. *Plant Physiol.* **2014**, *166*, 1891–1911. doi:10.1104/pp.114.248930
- Kuppusamy, T.; Hahne, D.; Ranathunge, K.; Lambers, H.; Finnegan, P.M. Delayed greening in phosphorus-efficient *Hakea prostrata* (Proteaceae) is a photoprotective and nutrient-saving strategy. *Funct. Plant Biol.* **2020**, *48*, 218–230. doi:10.1071/FP19285

- Lambers, H.; Cawthray, G.R.; Giavalisco, P.; Kuo, J.; Laliberté, E.; Pearse, S.J.; Scheible, W.R.; Stitt, M.; Teste, F.; Turner, B.L. Proteaceae from severely phosphorus-impovertished soils extensively replace phospholipids with galactolipids and sulfolipids during leaf development to achieve a high photosynthetic phosphorus-use-efficiency. *New Phytol.* **2012**, *196*, 1098–1108. doi:10.1111/j.1469-8137.2012.04285.x
- Lambers, H.; Wright, I.J.; Guilherme Pereira, C.; Bellingham, P.J.; Bentley, L.P.; Boonman, A.; Cernusak, L.A.; Foulds, W.; Gleason, S.M.; Gray, E.F.; et al. Leaf manganese concentrations as a tool to assess belowground plant functioning in phosphorus-impovertished environments. *Plant Soil* **2021**, *461*, 43–61. doi:10.1007/s11104-020-04690-2
- Lamont, B. Factors affecting the distribution of proteoid roots within the root systems of two *Hakea* species. *Aust. J. Bot.* **1973**, *21*, 165–187. doi:10.1071/BT9730165
- Lamont, B. The Effect of soil nutrients on the production of proteoid roots by *Hakea* Species. *Aust. J. Bot.* **1972**, *20*, 27–40, doi:10.1071/BT9720027
- Lamont, B. The effects of seasonality and waterlogging on the root systems of a number of *Hakea* Species. *Aust. J. Bot.* **1976**, *24*, 691–702. doi:10.1071/BT9760691
- Lamont, B.B. Structure, Ecology and physiology of root clusters - a review. *Plant Soil* **2003**, *248*, 1–19. doi:10.1023/A:1022314613217
- Lamont, B.B.; Groom, P.K. Green cotyledons of two *Hakea* Species control seedling mass and morphology by supplying mineral nutrients rather than organic compounds. *New Phytol.* **2002**, *153*, 101–110. doi:10.1046/j.0028-646X.2001.00300.x
- Lamont, B.B.; Groom, P.K. Seed and Seedling biology of the woody-fruited Proteaceae. *Aust. J. Bot.* **1998**, *46*, 387–406. doi:10.1071/BT96135
- Lamont, B.B.; Groom, P.K.; Cowling, R.M. High leaf mass per area of related species assemblages may reflect low rainfall and carbon isotope discrimination rather than low phosphorus and nitrogen concentrations. *Funct. Ecol.* **2002**, *16*, 403–412. doi:10.1046/j.1365-2435.2002.00631.x
- Lamont, B.B.; Groom, P.K.; Richards, M.B.; Witkowski, E.T.F. Recovery of *Banksia* and *Hakea* communities after fire in mediterranean Australia - the role of species identity and functional attributes. *Divers. Distrib.* **1999**, *5*, 15–26. doi:10.1046/j.1472-4642.1999.00032.x
- Lamont, B.B.; Groom, P.K.; Williams, M.; He, T. LMA, density and thickness: recognizing different leaf shapes and correcting for their nonlaminarity. *New Phytol.* **2015**, *207*, 942–947. doi:10.1111/nph.13465
- Lamont, B.B.; Hanley, M.E.; Groom, P.K.; He, T. Bird pollinators, seed storage and cockatoo granivores explain large woody fruits as best seed defense in *Hakea*. *Perspect. Plant Ecol. Evol. Syst.* **2016**, *21*, 55–77. doi:10.1016/j.ppees.2016.05.002
- Lamont, B.B.; He, T.; Lim, S.L. *Hakea*, the world's most *Sclerophyllous* Genus, arose in Southwestern Australian Heathland and diversified throughout Australia over the past 12million years. *Aust. J. Bot.* **2016**, *64*, 77–88. doi:10.1071/BT15134
- Lamont, B.B.; He, T.; Yan, Z. Evolutionary history of fire-stimulated resprouting, flowering, seed release and germination. *Biol. Rev.* **2019**, *94*, 903–928. doi:10.1111/brv.12483
- Lamont, B.B.; Milberg, P. Removal of the testa during germination or establishment increases germinant mortality, decay and water loss. *Seed Sci. Res.* **1997**, *7*, 245–252. doi:10.1017/s0960258500003597
- Lamont, B.B.; Pausas, J.G.; He, T.; Witkowski, E.T.F.; Hanley, M.E. Fire as a selective agent for both serotiny and nonserotiny over space and time. *CRC. Crit. Rev. Plant Sci.* **2020**, *39*, 140–172. doi:10.1080/07352689.2020.1768465
- Lamont, B.B.; Pérez-Fernández, M.; Rodríguez-Sánchez, J. Soil bacteria hold the key to root cluster formation. *New Phytol.* **2015**, *206*, 1156–1162. doi: 10.1111/nph.13228
- Lamont, B.B.; Witkowski, E.T.F.; Enright, N.J. Post-fire litter microsites: safe for seeds, unsafe for seedlings. *Ecology*, **1993**, *74*, 501–512. doi:10.2307/1939311
- Le Maitre, D.C.; Krug, R.M.; Hoffmann, J.H.; Gordon, A.J.; Mgidi, T.N. *Hakea sericea*: Development of a model of the impacts of biological control on population dynamics and rates of spread of an invasive species. *Ecol. Modell.* **2008**, *212*, 342–358. doi:10.1016/j.ecolmodel.2007.11.011
- Le Maitre, D.C.; Thuiller, W.; Schonegevel, L. Developing an approach to defining the potential distributions of invasive plant species: a case study of *Hakea* Species in South Africa. *Glob. Ecol. Biogeogr.* **2008**, *17*, 569–584. doi:10.1111/j.1466-8238.2008.00407.x
- Le Maitre, D.C.; Van Wilgen, B.W.; Gelderblom, C.M.; Bailey, C.; Chapman, R.A.; Nel, J.A. Invasive alien trees and water resources in South Africa: case studies of the costs and benefits of management. *For. Ecol. Manage.* **2002**, *160*, 143–159. doi:10.1016/S0378-1127(01)00474-1
- López, R.; Cano, F.J.; Martin-StPaul, N.K.; Cochard, H.; Choat, B. Coordination of stem and leaf traits define different strategies to regulate water loss and tolerance ranges to aridity. *New Phytol.* **2021**, *230*, 497–509. doi:10.1111/nph.17185
- Lubbe, C.M.; Denman, S.; Cannon, P.F.; Groenewald, J.Z.; Lamprecht, S.C.; Crous, P.W. Characterization of *Colletotrichum* species associated with diseases of Proteaceae. *Mycologia* **2004**, *96*, 1268–1279. doi:10.1080/15572536.2005.11832877
- Lubbe, C.M.; Denman, S.; Lamprecht, S.C.; Crous, P.W. Pathogenicity of *Colletotrichum* species to *Protea* cultivars. *Australas. Plant Pathol.* **2006**, *35*, 37–41. doi:10.1071/AP05097
- Lux, A.; Kohanová, J.; White, P.J. The secrets of calcicole species revealed. *J. Exp. Bot.* **2021**, *72*, 968–970. doi:10.1093/jxb/eraa555
- Lyons, C. L., English, K. F., & Hoffmann, J. H. Research on the biological control of *Hakea sericea* over the past ten years: lessons informing future management of the species in the Western Cape province, South Africa. *Afr. Entomol.* **2021**, *29*, 768–774. doi: 10.4001/003.029.0768

- Lyons, C.L.; Tshibalanganda, M.; Plessis, A. Du using CT-Scanning technology to quantify damage of the stem-boring beetle, *Aphanasium australe*, a biocontrol agent of *Hakea sericea* in South Africa. *Biocontrol Sci. Technol.* **2020**, *30*, 33–41. doi:10.1080/09583157.2019.1682518
- Martins, J.; Richardson, D.M.; Henriques, R.; Marchante, E.; Marchante, H.; Alves, P.; Gaertner, M.; Honrado, J.P.; Vicente, J.R. A multi-scale modelling framework to guide management of plant invasions in a transboundary context. *For. Ecosyst.* **2016**, *3*, 1–14. <https://doi.org/10.1186/s40663-016-0073-8>.
- Mason, R.A.B.; Cooke, J.; Moles, A.T.; Leishman, M.R. Reproductive output of invasive versus native plants. *Glob. Ecol. Biogeogr.* **2008**, *17*, 633–640. doi:10.1111/j.1466-8238.2008.00402.x
- Máximo, P.; Ferreira, L.M.; Branco, P.S.; Lourenço, A. Invasive plants: turning enemies into value. *Molecules* **2020**, *25*. doi:10.3390/molecules25153529
- McLay, T.G.B.; Bayly, M.J.; Ladiges, P.Y. Is South-Western Western Australia a centre of origin for Eastern Australian taxa or is the Centre an artefact of a method of analysis? A comment on *Hakea* and its supposed divergence over the past 12 million years. *Aust. Syst. Bot.* **2016**, *29*, 87–94. doi: 10.1071/SB16024
- Meehan, M.; Keirsten-Wakefield, A.; Cowan, M.; Atkinson, J. Premature opening and dimorphism in '*Hakea decurrens*' (Proteaceae) follicles: A bet-hedging regeneration strategy?. *Vic. Nat.* **2015**, *132*, 139–146.
- Meijninger, W.M.L.; Jarmain, C. Satellite-based annual evaporation estimates of invasive alien plant species and native vegetation in South Africa. *Water S.A.* **2014**, *40*, 95–108. doi:10.4314/wsa.v40i1.12
- Midgley, J. What are the relative costs, limits and correlates of increased degree of serotiny?. *Austral Ecol.* **2000**, *25*, 65–68. doi:10.1046/j.1442-9993.2000.01011.x
- Midgley, J.J.; Cowling, R.M.; Lamont, B.B. Relationship of follicle size and seed size in *Hakea* (Proteaceae); isometry, allometry and adaptation. *South African J. Bot.* **1991**, *57*, 107–110. doi:10.1016/s0254-6299(16)30968-1
- Milberg, P.; Lamont, B.B. Seed/cotyledon size and nutrient content play a major role in early performance of species on nutrient-poor soils. *New Phytol.* **1997**, *137*, 665–672. doi:10.1046/j.1469-8137.1997.00870.x
- Milberg, P.; Pérez-Fernández, M.A.; Lamont, B.B. Seedling growth response to added nutrients depends on seed size in three woody genera. *J. Ecol.* **1998**, *86*, 624–632. doi:10.1046/j.1365-2745.1998.00283.x
- Miller, R.G.; Tangney, R.; Enright, N.J.; Fontaine, J.B.; Merritt, D.J.; Ooi, M.K.J.; Ruthrof, K.X.; Miller, B.P. Mechanisms of fire seasonality effects on plant populations. *Trends Ecol. Evol.* **2019**, *34*, 1104–1117. doi:10.1016/j.tree.2019.07.009
- Mitchell, D.T.; Allsopp, N. Changes in the phosphorus composition of seeds of *Hakea sericea* (Proteaceae) during germination under low phosphorus conditions. *New Phytologist* **1984**, *96*, 239–247. doi: 10.1111/j.1469-8137.1984.tb03560.x
- Moll, E.J.; Trinder-Smith, T. Invasion and control of alien woody plants on the Cape peninsula mountains South Africa - 30 Years On. *Biol. Conserv.* **1992**, *60*, 135–143. doi:10.1016/0006-3207(92)91164-N
- Moodley, D.; Geerts, S.; Rebelo, T.; Richardson, D.M.; Wilson, J.R.U. Site-specific conditions influence plant naturalization: the case of alien Proteaceae in South Africa. *Acta Oecologica* **2014**, *59*, 62–71. doi:10.1016/j.actao.2014.05.005
- Moodley, D.; Geerts, S.; Richardson, D.M.; Wilson, J.R.U. The importance of pollinators and autonomous self-fertilisation in the early stages of plant invasions: *Banksia* and *Hakea* (Proteaceae) as case studies. *Plant Biol.* **2016**, *18*, 124–131. doi:10.1111/plb.12334
- Morais, M.C.; Cabral, J.A.; Gonçalves, B. Seasonal variation in the leaf physiology of co-occurring invasive (*Hakea sericea*) and native (*Pinus pinaster*) woody species in a Mediterranean-Type Ecosystem. *For. Ecol. Manage.* **2021**, *480*, 118662. doi:10.1016/j.foreco.2020.118662
- Morais, M.C.; Gonçalves, B.; Cabral, J.A. A Dynamic modeling framework to evaluate the efficacy of control actions for a woody invasive plant, *Hakea sericea*. *Front. Ecol. Evol.* **2021**, *9*, 1–9. doi:10.3389/fevo.2021.641686
- Moran, V.C.; Hoffmann, J.H. Conservation of the Fynbos Biome in the Cape Floral Region: The role of biological control in the management of invasive alien trees. *BioControl* **2012**, *57*, 139–149. doi:10.1007/s10526-011-9403-5
- Morris, M.J. A method for controlling *Hakea sericea* Schrad. seedlings using the fungus *Colletotrichum gloeosporioides* (Penz.) Sacc. *Weed Res.* **1989**, *29*, 449–454. doi:10.1111/j.1365-3180.1989.tb01317.x
- Morris, M.J. The use of plant pathogens for biological weed control in South Africa. *Agric. Ecosyst. Environ.* **1991**, *37*, 239–255. doi:10.1016/0167-8809(91)90153-O
- Morris, M.J.; Wood, A.R.; Den Breëyen, A. Plant pathogens and biological control of weeds in South Africa: a review of projects and progress during the last decade. *African Entomol.* **1999**, 129–137.
- Morrison, D.A.; Renwick, J.A. Effects of variation in fire intensity on regeneration of co-occurring species of small trees in the Sydney Region. *Aust. J. Bot.* **2000**, *48*, 71–79. doi:10.1071/BT98054
- Muler, A.L.; Oliveira, R.S.; Lambers, H.; Veneklaas, E.J. Does cluster-root activity benefit nutrient uptake and growth of co-existing species?. *Oecologia*, **2014**, *174*, 23–31. doi:10.1007/s00442-013-2747-z
- Nolan, R.H.; Fairweather, K.A.; Tarin, T.; Santini, N.S.; Cleverly, J.; Faux, R.; Eamus, D. Divergence in plant water-use strategies in semiarid woody species. *Funct. Plant Biol.* **2017**, *44*, 1134–1146. doi:10.1071/FP17079
- Nunes, L.J.R.; Rodrigues, A.M.; Loureiro, L.M.E.F.; Sá, L.C.R.; Matias, J.C.O. Energy recovery from invasive species: creation of value chains to promote control and eradication. *Recycling* **2021**, *6*, 21. doi:10.3390/recycling6010021
- Olde, P. The Hakeinae in horticulture. *Acta Hort.* **2015**, 1097. doi:10.17660/ActaHortic.2015.1097.18
- Oyanoghafo, O.O.; O'Brien, C.; Choat, B.; Tissue, D.; Rymer, P.D. Vulnerability to xylem cavitation of *Hakea* Species (Proteaceae) from a range of biomes and life histories predicted by climatic niche. *Ann. Bot.* **2021**, *127*, 909–918. doi:10.1093/aob/mcab020

- Paungfoo-Lonhienne, C.; Lonhienne, T.G.A.; Rentsch, D.; Robinson, N.; Christie, M.; Webb, R.I.; Gamage, H.K.; Carroll, B.J.; Schenk, P.M.; Schmidt, S. Plants can use protein as a nitrogen source without assistance from other organisms. *Proc. Natl. Acad. Sci. U. S. A.* **2008**, *105*, 4524–4529. doi:10.1073/pnas.0712078105
- Paungfoo-Lonhienne, C.; Schenk, P.M.; Lonhienne, T.G.; Brackin, R.; Meier, S.; Rentsch, D.; Schmidt, S. Nitrogen affects cluster root formation and expression of putative peptide transporters. *J. Exp. Bot.* **2009**, *60*, 2665–2676.
- Pearce, C.A.; Reddell, P.; Hyde, K.D. Revision of the Phyllachoraceae (Ascomycota) on hosts in the angiosperm family, Proteaceae. *Aust. Syst. Bot.* **2001**, *14*, 283–328. doi:10.1071/SB00006
- Penman, T.D.; Penman, S.H. Influence of Prescribed burning on fruit production in Proteaceae. *Pacific Conserv. Biol.* **2010**, *16*, 46–53. doi:10.1071/pc100046
- Pepo, C.; Forte, P.; Teixeira, G.; Monteiro, A. Gestão das invasoras lenhosas "Hakea salicifolia" e "Hakea sericea". In Proceedings of the XII Congr. da SEMh/XIX Congr. da ALAM/II Congr. da IBCM, Lisboa (2009).
- Pepo, C.; Monteiro, A.; Forte, P.; Teixeira, G. Biologia da germinação das invasoras *Hakea salicifolia* e *H. sericeae*. In Proceedings of the XII Congresso da SEMh/XIX Congresso da ALAM/II Congresso da IBCM, Lisbon, Portugal, 10 November 2009.
- Perry, G.L.W.; Wilmshurst, J.M.; McGlone, M.S. Ecology and Long-term history of fire in New Zealand. *N. Z. J. Ecol.* **2014**, *38*, 157–176.
- Pickard, J.O.H.N.; Jacobs, S.W.L. *Vegetation Patterns on the Sassafras Plateau*; Australian and New Zealand Geomorphology Group: Wollongong, Australia, 1983; pp. 54–65.
- Poot, P.; Lambers, H. Are Trade-Offs in allocation pattern and root morphology related to species abundance? a congeneric comparison between rare and common species in the South-Western Australian Flora. *J. Ecol.* **2003**, *91*, 58–67. doi:10.1046/j.1365-2745.2003.00738.x
- Poot, P.; Lambers, H. Growth responses to waterlogging and drainage of woody *Hakea* (Proteaceae) seedlings, originating from contrasting habitats in South-Western Australia. *Plant Soil* **2003**, *253*, 57–70. doi:10.1023/A:1024540621942
- Prodhon, M.A.; Jost, R.; Watanabe, M.; Hoefgen, R.; Lambers, H.; Finnegan, P.M. Tight Control of Nitrate Acquisition in a Plant Species That Evolved in an Extremely Phosphorus-Impoverished Environment. *Plant Cell Environ.* **2016**, *39*, 2754–2761. doi:10.1111/pce.12853
- Prodhon, M.A.; Jost, R.; Watanabe, M.; Hoefgen, R.; Lambers, H.; Finnegan, P.M. Tight control of sulfur assimilation: An adaptive mechanism for a plant from a severely phosphorus-impooverished habitat. *New Phytol.* **2017**, *215*, 1068–1079, doi:10.1111/nph.14640
- Queirós, C.S.G.P.; Cardoso, S.; Ferreira, J.; Miranda, I.; Lourenço, M.J. V.; Pereira, H. Characterization of *Hakea sericea* Fruits Regarding Chemical Composition and Extract Properties. *Waste and Biomass Valorization* **2020**, *11*, 4859–4870. doi:10.1007/s12649-019-00818-3
- Rafferty, C.; Lamont, B.B.; Hanley, M.E. Selective feeding by Kangaroos (*Macropus fuliginosus*) on seedlings of *Hakea* Species: effects of chemical and physical defences. *Plant Ecol.* **2005**, *177*, 201–208. doi:10.1007/s11258-005-2362-0
- Rafferty, C.M.; Lamont, B.B.; Hanley, M.E. Herbivore feeding preferences in captive and wild populations. *Austral Ecol.* **2010**, *35*, 257–263. doi:10.1111/j.1442-9993.2009.02031.x
- Rathé, A.A.; Pilkington, L.J.; Gurr, G.M.; Daugherty, M.P. Potential for persistence and within-plant movement of *Xylella fastidiosa* in Australian native plants. *Australas. Plant Pathol.* **2012**, *41*, 405–412. doi:10.1007/s13313-011-0116-0
- Richards, M.B.; Groom, P.K.; Lamont, B.B. A Trade-off between Fecundity and drought susceptibility in adults and seedlings of *Hakea* Species as influenced by leaf morphology. *Aust. J. Bot.* **1997**, *45*, 301–309. doi:10.1071/BT96012
- Richards, M.B.; Lamont, B.B. Post-Fire mortality and water relations of three congeneric shrub species under extreme water stress - a trade-off with fecundity? *Oecologia* **1996**, *107*, 53–60. doi:10.1007/BF00582234
- Richardson, D.M. A Cartographic analysis of physiographic factors influencing the distribution of *Hakea* Spp in the South Western Cape. *South African For. J.* **1984**, *128*, 36–40. doi:10.1080/00382167.1984.9628925
- Richardson, D.M.; Manders, P.T. Predicting Pathogen-induced Mortality in *Hakea sericea* (Proteaceae), an Aggressive Alien Plant Invader in South Africa. *Ann. Appl. Biol.* **1985**, *106*, 243–254. doi:10.1111/j.1744-7348.1985.tb03114.x
- Richardson, D.M.; Rejmánek, M. Trees and shrubs as invasive alien species - a global review. *Divers. Distrib.* **2011**, *17*, 788–809. doi:10.1111/j.1472-4642.2011.00782.x
- Richardson, D.M.; Van Wilgen, B.W. Factors affecting the regeneration success of *Hakea sericea*. *South African For. J.* **1984**, *131*, 63–68. doi:10.1080/00382167.1984.9629532
- Richardson, D.M.; Van Wilgen, B.W. The Effects of fire in felled *Hakea sericea* and Natural Fynbos implications for weed control in Mountain Catchments. *South African For. J.* **1986**, *139*, 4–14. doi:10.1080/00382167.1986.9630051
- Richardson, D.M.; Van Wilgen, B.W.; Mitchell, D.T. Aspects of the reproductive ecology of four Australian *Hakea* Species (Proteaceae) in South Africa. *Oecologia* **1987**, *71*, 345–354. doi:10.1007/BF00378706
- Roelofs, R.F.R.; Rengel, Z.; Cawthray, G.R.; Dixon, K.W.; Lambers, H. Exudation of carboxylates in Australian Proteaceae: chemical composition. *Plant, Cell & Environ.* **2001**, *24*, 891–904. doi:10.1046/j.1365-3040.2001.00741.x
- Sampson, J.F.; Byrne, M.; Gibson, N.; Yates, C. Limiting inbreeding in disjunct and isolated populations of a woody shrub. *Ecol. Evol.* **2016**, *6*, 5867–5880. doi:10.1002/ece3.2322
- Santini, N.S.; Cleverly, J.; Faux, R.; Lestrangle, C.; Rumman, R.; Eamus, D. Xylem traits and water-use efficiency of woody species co-occurring in the Ti Tree Basin Arid Zone. *Trees - Struct. Funct.* **2016**, *30*, 295–303. doi:10.1007/s00468-015-1301-5

- Santini, N.S.; Cleverly, J.; Faux, R.; McBean, K.; Nolan, R.; Eamus, D. Root xylem characteristics and hydraulic strategies of species co-occurring in semi-arid Australia. *IAWA J.* **2018**, *39*, 43–62.
- Sañudo, Í.P. Aportaciones a la flora del sur de Galicia (NO España). *Bot. Complut.* **2006**, *30*, 113–116.
- Schmidt, S.; Mason, M.; Sangtewan, T.; Stewart, G.R. Do cluster roots of *Hakea* actities (Proteaceae) acquire complex organic nitrogen?. *Plant Soil* **2003**, *248*, 157–165. doi:10.1023/A:1022352415728
- Schmidt, S.; Stewart, G.R. Glycine metabolism by plant roots and its occurrence in Australian plant communities. *Funct. Plant Biol.* **1999**, *26*, 253–264. doi:10.1071/PP98116
- Schmidt, S.; Stewart, G.R. Waterlogging and Fire Impacts on Nitrogen Availability and utilization in a Subtropical Wet Heathland (Wallum). *Plant, Cell Environ.* **1997**, *20*, 1231–1241. doi:10.1046/j.1365-3040.1997.d01-20.x
- Schütte, K.H. *Hakea* Eradication by means of new herbicides. *J. South African For. Assoc.* **1953**, *23*, 30–36. doi:10.1080/03759873.1953.9630722
- Shane, M.W.; Cramer, M.D.; Funayama-Noguchi, S.; Cawthray, G.R.; Millar, A.H.; Day, D.A.; Lambers, H. Developmental physiology of cluster-root carboxylate synthesis and exudation in harsh *Hakea*. *Plant Physiol.* **2004**, *135*, 549–560. doi:10.1104/pp.103.035659
- Shane, M.W.; De Vos, M.; De Roock, S.; Cawthray, G.R.; Lambers, H. Effects of external phosphorus supply on internal phosphorus concentration and the initiation, growth and exudation of cluster roots in *Hakea prostrata* R.Br. *Plant Soil* **2003**, *248*, 209–219. doi:10.1023/A:1022320416038
- Shane, M.W.; Lambers, H. Cluster Roots: A Curiosity in Context. *Plant Soil* **2005**, *274*, 101–125. doi:10.1007/s11104-004-2725-7
- Shane, M.W.; Lambers, H. Manganese accumulation in leaves of *Hakea prostrata* (Proteaceae) and the significance of cluster roots for micronutrient uptake as dependent on phosphorus supply. *Physiol. Plant.* **2005**, *124*, 441–450. doi:10.1111/j.1399-3054.2005.00527.x
- Shane, M.W.; McCully, M.E.; Lambers, H. Tissue and cellular phosphorus storage during development of phosphorus toxicity in *Hakea prostrata* (Proteaceae). *J. Exp. Bot.* **2004**, *55*, 1033–1044. doi:10.1093/jxb/erh111
- Shane, M.W.; Stigter, K.; Fedosejevs, E.T.; Plaxton, W.C. Senescence-inducible cell wall and intracellular purple acid phosphatases: implications for phosphorus remobilization in *Hakea prostrata* (Proteaceae) and *Arabidopsis thaliana* (Brassicaceae). *J. Exp. Bot.* **2014**, *65*, 6097–6106. doi:10.1093/jxb/eru348
- Shane, M.W.; Szota, C.; Lambers, H. A root trait accounting for the extreme phosphorus sensitivity of *Hakea prostrata* (Proteaceae). *Plant, Cell & Environ.* **2004**, *27*, 991–1004. doi:10.1111/j.1365-3040.2004.01204.x
- Silva, J.S.; Deus, E.; Nereu, M.; Davim, D.; Rossa, C. Aliens & Flames: A new research initiative joining fire behaviour and invasion ecology. In *Advances in Forest Fire Research*, Imprensa da Universidade de Coimbra: Coimbra, Portugal, 2018; Volume 1, pp. 1219–1222. <https://doi.org/10.14195/978-989-26-16-506>.
- Silva, J.S.; Nereu, M.; Queirós, L.; Deus, E.; Fernandes, P. Fire hazard and plant invasions – the cases of *Hakea Sericea* and *Acacia dealbata* in Portugal. In Proceedings of the 15th Conference on Ecology and Management of Alien Plant invasions, Prague, Czech Republic, September of 2019.
- Skeels, A.; Cardillo, M. Environmental niche conservatism explains the accumulation of species richness in Mediterranean-hotspot plant genera. *Evolution*, **2017**, *71*, 582–594. doi:10.1111/evo.13179
- Skeels, A.; Cardillo, M. Equilibrium and Non-Equilibrium Phases in the Radiation of *Hakea* and the drivers of diversity in Mediterranean-type ecosystems. *Evolution (N. Y)* **2019**, *73*, 1392–1410. doi:10.1111/evo.13769
- Skeels, A.; Dinnage, R.; Medina, I.; Cardillo, M. Ecological interactions shape the evolution of flower color in communities across a temperate biodiversity hotspot. *Evol. Lett.* **2021**, *5*, 277–289. doi:10.1002/evl3.225
- Smith, L.; Gordon, A.J. A need for an additional biological control agent on *Hakea sericea* Schrad. & J.C. Wendl. (Proteaceae) in South Africa. *Afr. Entomol.* **2009**, *17*, 200–206. doi:10.4001/003.017.0210
- Sousa, M.F.; Façanha, A.R.; Tavares, R.M.; Lino-Neto, T.; Gerós, H. Phosphate Transport by Proteoid Roots of *Hakea Sericea*. *Plant Sci.* **2007**, *173*, 550–558. doi:10.1016/j.plantsci.2007.08.006
- Sousa, M.F.; Tavares, R.M.; Gerós, H.; Lino-Neto, T. First report of *Hakea sericea* leaf infection caused by *Pestalotiopsis funerea* in Portugal. *Plant Pathol.* **2004**, *53*, 535. doi:10.1111/j.1365-3059.2004.01042.x
- Standish, R.J.; Alborno, F.E.; Morald, T.K.; Hobbs, R.J.; Tibbett, M. Mycorrhizal symbiosis and phosphorus supply determine interactions among plants with contrasting nutrient-acquisition strategies. *J. Ecol.* **2021**, *109*, 3892–3902. doi:10.1111/1365-2745.13766
- Standish, R.J.; Stokes, B.A.; Tibbett, M.; Hobbs, R.J. Seedling response to phosphate addition and inoculation with arbuscular mycorrhizas and the implications for old-field restoration in Western Australia. *Environ. Exp. Bot.* **2007**, *61*, 58–65. doi:10.1016/j.envexpbot.2007.03.004
- Stock, W.D.; Pate, J.S.; Delfs, J. Influence of seed size and quality on seedling development under low nutrient conditions in five Australian and South African members of the Proteaceae. *J. Ecol.* **1990**, *78*, 1005. doi:10.2307/2260949
- Stock, W.D.; Verboom, G.A. Phylogenetic ecology of foliar N and P concentrations and N:P Ratios across Mediterranean-Type ecosystems. *Glob. Ecol. Biogeogr.* **2012**, *21*, 1147–1156. doi:10.1111/j.1466-8238.2011.00752.x
- Sulpice, R.; Ishihara, H.; Schlereth, A.; Cawthray, G.R.; Encke, B.; Giavalisco, P.; Ivakov, A.; Arrivault, S.; Jost, R.; Krohn, N.; et al. Low levels of ribosomal RNA partly account for the very high photosynthetic phosphorus-use efficiency of Proteaceae species. *Plant, Cell Environ.* **2014**, *37*, 1276–1298. doi:10.1111/pce.12240



- Tanner, R.; Branquart, E.; Brundu, G.; Buholzer, S.; Chapman, D.; Ehret, P.; Fried, G.; Starfinger, U.; van Valkenburg, J. The prioritisation of a short list of alien plants for risk analysis within the framework of the Regulation (EU) No. 1143/2014. *NeoBiota* **2017**, *35*, 87–118. doi:10.3897/neobiota.35.12366
- Tasker, E.M.; Denham, A.J.; Taylor, J.E.; Strevens, T.C. Post-fire seed predation: Does distance to unburnt vegetation matter?. *Austral Ecol.* **2011**, *36*, 755–766. doi:10.1111/j.1442-9993.2010.02214.x
- Teixeira, G.; Monteiro, A.; Pepo, C. Leaf morphoanatomy in *Hakea sericea* and *H. salicifolia*. *Microsc. Microanal.* **2008**, *14*, 109–110. doi:10.1017/S1431927608089563
- Tonnabel, J.; Van Dooren, T.J.M.; Midgley, J.; Haccou, P.; Mignot, A.; Ronce, O.; Olivieri, I. Optimal resource allocation in a serotinous non-resprouting plant species under different fire regimes. *J. Ecol.* **2012**, *100*, 1464–1474. doi:10.1111/j.1365-2745.2012.02023.x
- Van Der Weide, R.Y.; Bleeker, P.O.; Achten, V.T.J.M.; Lotz, L.A.P.; Fogelberg, F.; Melander, B. Innovation in mechanical weed control in crop rows. *Weed Res.* **2008**, *48*, 215–224. doi:10.1111/j.1365-3180.2008.00629.x
- Van Rensburg, J.; Van Wilgen, B.W.; Richardson, D.M. Reconstructing the spread of invasive alien plants on privately-owned land in the Cape floristic region: Vergelegen Wine Estate as a Case Study. *South African Geogr. J.* **2018**, *100*, 180–195. doi:10.1080/03736245.2017.1340187
- Van Wilgen, B., Richardson, D.M. The effects of alien shrub invasions on vegetation structure and fire behaviour in South African Fynbos Shrublands : a simulation study. *J. Appl. Ecol.* **1985**, *22*, 955–966.
- Van Wilgen, B.W.; Fill, J.M.; Baard, J.; Cheney, C.; Forsyth, A.T.; Kraaij, T. Historical costs and projected future scenarios for the management of invasive alien plants in protected areas in the Cape floristic region. *Biol. Conserv.* **2016**, *200*, 168–177. doi:10.1016/j.biocon.2016.06.008
- Van Wilgen, B.W.; Forsyth, G.G.; Le Maitre, D.C.; Wannenburgh, A.; Kotzé, J.D.F.; van den Berg, E.; Henderson, L. An Assessment of the effectiveness of a large, national-scale invasive alien plant control strategy in South Africa. *Biol. Conserv.* **2012**, *148*, 28–38. doi:10.1016/j.biocon.2011.12.035
- Van Wilgen, B.W.; Reyers, B.; Le Maitre, D.C.; Richardson, D.M.; Schonegevel, L. A biome-scale assessment of the impact of invasive alien plants on ecosystem services in South Africa. *J. Environ. Manage.* **2008**, *89*, 336–349. doi:10.1016/j.jenvman.2007.06.015
- Warren, C.R.; Adams, M.A. Capillary electrophoresis for the determination of major amino acids and sugars in foliage: application to the nitrogen nutrition of *Sclerophyllous* species. *J. Exp. Bot.* **2000**, *51*, 1147–1157. doi:10.1093/jexbot/51.347.1147
- Wells, M.J. Introduced plants of the fynbos biome. In *Biogeography of Mediterranean Invasions*; Cambridge University Press: Cambridge, United Kingdom, 1991; pp. 115–129.
- Whelan, R.J.; York, J. Post-fire germination of *Hakea sericea* and *Petrophile sessilis* after spring burning. *Aust. J. Bot.* **1998**, *46*, 367–376. doi:10.1071/BT97075
- Whitworth-Hulse, J.I.; Magliano, P.N.; Zeballos, S.R.; Aguiar, S.; Baldi, G. Global patterns of rainfall partitioning by invasive woody plants. *Glob. Ecol. Biogeogr.* **2021**, *30*, 235–246. doi:10.1111/geb.13218
- Williams, P.A. *Hakea Salicifolia*: Biology and role in succession in Abel Tasman National Park, New Zealand. *J. R. Soc. New Zeal.* **1992**, *22*, 1–18. doi:10.1080/03036758.1992.10420814
- Williams, P.A. *Hakea sericea*: seed production and role in succession in Golden Bay, Nelson. *J. R. Soc. New Zeal.* **1992**, *22*, 307–320. doi:10.1080/03036758.1992.10420824
- Williams, P.R. Clarke, P.J. Habitat segregation by serotinous shrubs in heaths: post-fire emergence and seedling survival. *Aust. J. Bot.* **1997**, *45*, 31–39. doi:10.1071/BT96076
- Wood, A.R.; Breeyen, A. Incidence of gummosis disease in silky *Hakea* under natural conditions in South Africa. *South African J. Plant Soil* **2021**, *38*, 126–133. doi:10.1080/02571862.2021.1879286
- Wood, A.R.; Den Breejën, A. Plant pathogens and biological control of invasive alien plants in South Africa: A Review of Projects and Progress (2011–2020). *African Entomol.* **2021**, *29*, 983–1004. doi:10.4001/003.029.0983
- Wyse, S. V.; Perry, G.L.W.; Curran, T.J. Shoot-level flammability of species mixtures is driven by the most flammable species: implications for vegetation-fire feedbacks favouring invasive species. *Ecosystems* **2018**, *21*, 886–900. doi:10.1007/s10021-017-0195-z
- Yan, L.; Zhang, X.; Han, Z.; Pang, J.; Lambers, H.; Finnegan, P.M. Responses of foliar phosphorus fractions to soil age are diverse along a 2 Myr dune chronosequence. *New Phytol.* **2019**, *223*, 1621–1633. doi:10.1111/nph.15910
- Yusiharni, E.; Gilkes, R. Minerals in the ash of Australian native plants. *Geoderma* **2012**, *189–190*, 369–380. doi:10.1016/j.geoderma.2012.06.035
